# Supplementary material for: Phase 3 Clinical Trial Comparing the Safety and Efficacy of Netarsudil to Ripasudil in Patients with Primary Open-Angle Glaucoma or Ocular Hypertension: Japan Rho Kinase Elevated Intraocular Pressure Treatment Trial (J-ROCKET)
Source: PubMed Central journal article supplement — Adv Ther. 2023 Aug 21;40(10):4639–56. doi: 10.1007/s12325-023-02550-w (PMC10499948; doi:10.1007/s12325-023-02550-w), 2023-08-21
Supplement: 12325_2023_2550_MOESM1_ESM.pdf [file 12325_2023_2550_MOESM1_ESM.pdf]

## Supplementary Materials

### **Phase 3 Clinical Trial Comparing the Safety and Efficacy of Netarsudil to Ripasudil in Patients with Primary Open-Angle Glaucoma or Ocular Hypertension: Japan Rho Kinase Elevated Intraocular Pressure Treatment Trial (J-ROCKET)**

Makoto Araie<sup>1</sup>; Kazuhisa Sugiyama<sup>2</sup>; Kenji Aso<sup>3</sup>; Koji Kanemoto<sup>3</sup>; Ryo Iwata<sup>3</sup>; David A. Hollander<sup>4</sup>; Michelle Senchyna<sup>4</sup>; Casey C. Kocczynski<sup>4</sup>

<sup>1</sup>Sekikawa Hospital, Tokyo, Japan

<sup>2</sup>Department of Ophthalmology, Kanazawa University Graduate School of Medical Science, Ishikawa, Japan

<sup>3</sup>Aerie Pharmaceuticals, Ireland Ltd. (Japan Branch), Tokyo, Japan

<sup>4</sup>Aerie Pharmaceuticals, Inc., Durham, NC., USA

#### **Corresponding Author:**

Makoto Araie

Sekikawa Hospital, 1-4-1, Nishinippori, Arakawa-ku, Tokyo

e-mail: m.araie-tyk@nifty.com

## **Institutional Review Board (IRB) Information**

Shin-Akasaka Clinic IRB

5-5-1, Roppongi, Minato-ku, Tokyo, 106-0032, Japan

Telephone: +81-3-5770-1250

Yokohama Minoru Clinic IRB

1-13-8, Bessho, Minami-ku, Yokohama-shi, Kanagawa, 232-0064, Japan

Telephone: +81-45-722-8655

Japan Conference of Clinical Research IRB

1-13-23, Minamiikebukuro, Toshima-ku, Tokyo, 171-0022, Japan

Telephone: +81-3-6868-7022

Adachi Kyosai Hospital IRB

1-36-8, Yanagihara, Adachi-ku, Tokyo, 120-0022, Japan

Telephone: +81-3-3881-6116

Kobori Central IRB

5-11-8, Nishinippori, Arakawa-ku, Tokyo, 116-0013, Japan

Telephone: +81-3-3805-8181

Osaka Pharmacology Clinical Research Hospital IRB

4-1-29, Miyahara, Yodogawa-ku, Osaka-shi, Osaka, 532-0003, Japan

Telephone: +81-6-6395-9000
